# Supplementary material for: Dissection of Pleiotropic QTL Regions Controlling Wheat Spike Characteristics Under Different Nitrogen Treatments Using Traditional and Conditional QTL Mapping
Source: Front Plant Sci. 2019 Feb 26;10:187. doi: 10.3389/fpls.2019.00187 (PMC6400075; doi:10.3389/fpls.2019.00187)
Supplement: Supplementary file 1 [file Data_Sheet_1.xlsx]

## Sheet: Table S1
Table S1 The envrionmental information in four trials
Trials	Year	Location	Accumulated temperature (℃) from October 1st to next June 15th (approximate to wheat growth period in North China Plain)	Rain fall (mm) from October 1st to next June 15th (approximate to wheat growth period in North China Plain)	Environments	Soli nitrate-nitrogen contents (mg.kg-1)	Soli total nitrogen contents (mg.kg-1)
T1	2011-2012	Shijiazhuang	2007.9	78.8	T1LN	10.59	992.34
					T1HN	43.06	1061.38
T2	2012-2013	Shijiazhuang	1832.4	96.4	T2LN	21.77	954.75
					T2HN	38.57	1075.13
T3	2012-2013	Beijing	1515.6～2229.6	147.6～261.9	T3LN	31.38	1293.38
					T3HN	31.38	1293.38
T4	2013-2014	Shijiazhuang	2300.2	48.2	T4LN	13.4	881.97
					T4HN	49.3	1034.72
Note: the accumulated temperature data and rain fall data in Shijiazhuang were kindly provided by the local meteorological station in Luancheng test station (the field experiment site in Shijiazhuang) and the accumulated temperature data and rain fall data in Beijing was got from weisite public information.

## Sheet: Table S2
Table S2 Analysis of variance (ANOVA) for the investigated traits
Traits	Sources of variation a
	Genotypes	Environments	G×E a
HD (days)	2401.58***	212714.74***	1401.58***
SL (cm)	769.07***	56.63***	866.07***
SN	1838.13***	86.88***	825.13***
SC	67.55***	33.86**	97.35***
FSN	1726.45***	121.01**	1554.43***
SSN	483.52***	80.04***	453.25***
a The letter G represents genotype, and the letter E represents environment.
* Indicates significance at the level of 0.05.
** Indicates significance at the level of 0.01.
*** Indicates significance at the level of 0.001.

## Sheet: Table S3
Table S3 Phenotypic values of six spike traits of the two parents and the KJ-RIL population
Traits	Parents											KJ-RIL Population
	KN9204										J411 a	Mean	Min	Max	SD	CV(%)	Skewness	Kurtoness	hB2 (%)
HD (days)	208.72										210.48 *	210.39	205.13	215	1.53	0.72	-0.39	0.32	57.47
SL (cm)	7.99										7.93 *	7.93	6.2	10.99	0.76	9.28	0.27	0.96	50.3
SN	18.82										19.03 **	18.86	15.43	22.38	1.23	6.65	0.07	-0.23	52.59
SC	2.36										2.30 *	2.32	1.69	3.23	0.23	9.74	0.51	0.77	56.98
FSN	17.04										17.85 **	16.82	12.98	20.4	1.27	7.68	0.05	0.03	77.06
SSN	1.78										1.19 ***	2.01	0.58	4.24	0.64	36.09	0.61	0.4	57.15
a The significant difference noted in this column indicates the differences comparison result between KN9204 and J411
* Indicates significance at the level of 0.05.
** Indicates significance at the level of 0.01.
*** Indicates significance at the level of 0.001.

## Sheet: Table S4
Table S4 Correlations among the investigated traits in this study
Traits	HD	SL	SN	SC	FSN	SSN
HD (days)	1	.
SL (cm)	0.307**	1
SN	0.389**	0.888**	1
SC	0.172*	-0.769**	0.302**	1
FSN	0.423**	0.781**	0.857**	0.214**	1
SSN	-0.039	0.242**	0.317**	0.176*	-0.212**	1
Note: The average phenotypic value in the eight environments was used to conduct the correlation analysis of the six investigated traits.
** Indicates significance at the level of 0.01.

## Sheet: Table S5
Table S5 The putative traditional QTL detected in individual environments by IciMapping software
Traits	QTL	Left CI	Right CI	Environments (LOD, PVE, additive effect)		Mean of LOD	Mean of PVE	Mean of additive effect
				LN	HN
HD (days)	qHd-1B.1	14.5	17.5		T2	6.08	8.2	0.37
	qHd-1B.2	42.5	43.5	T2		3.86	3.02	0.21
	qHd-1D	243.5	244		T3	3.85	4.68	-0.45
	qHd-2B.1	70.5	73.5	T3 (4.09, 6.81, -0.55),	T3 (5.34, 7.13, -.056 )	4.72	7.06	-0.55
	qHd-2B.2	95.5	96.5		T1	3.26	3.87	-0.25
	qHd-2D.1	88.5	90.5		T1 (10.61, 14.18, -0.46),	12.22	18.39	-0.54
				T2 (18.24, 24.98, -0.60),	T2 (12.35, 17.69, -0.52),
				T3 (5.17, 8.58, -0.60),	T3 (11.65, 16.77, -0.84),
				T4 (16.69, 23.34, -0.68),	T4 (24.03, 27.01, -0.85)
				P (10.23, 10.22, -0.65)	P (12.33, 26.01,-0.32)
	qHd-2D.2	144.5	146.5		T1	4.86	6.45	-0.35
	qHd-3A.1	0	2.5		T1	5.3	6.45	0.36
	qHd.3A.2	39.5	43.5		T2	3.81	4.1	0.24
	qHd-3B.1	35.5	43.5	T1 (4.91, 5.38, 0.28),		4.67	5.89	0.3
				T4 (4.59, 5.74, 0.33)
				P (4.58, 6.22, 0.29)
	qHd-3B.2	228.5	229.5		T4	3.88	2.64	0.26
	qHd-3D	55.5	56.5	T1		4.86	5.38	0.28
	qHd-4A.1	12.5	18.5		T4	5.21	4.7	-0.35
	qHd-4A.2	154.5	156.5	T1 (5.54, 6.40, -0.30),		4.27	5.6	-0.31
				T2 (6.39, 7.69, -0.32),
					T4 (3.68, 2.50, -0.25)
					P (3.33, 2.01,-0.32)
	qHd-4B.1	35.5	46		T1 (4.51, 5.67, 0.30),	8.32	14.03	0.64
				T2 (10.91, 13.45, 0.44),	T2 (5.71, 7.43, 0.34),
				T3 (12.43, 22.20, 0.97),	T3 (15.18, 22.29, 0.97),
				T4 (3.82, 3.36, 0.25),	T4 (6.92, 6.46, 0.41)
				P (10.23, 15.22, 0.65)	P (6.23, 15.32, 0.75)
	qHd-4B.2	71.5	72.5	T1		4.19	4.87	0.28
	qHd-4B.3	103.5	105.5		T1 (5.79, 7.22, 0.33),	5.17	6.47	0.41
					T3 (4.54, 5.71, 0.49)
	qHd-4B.4	114.5	117.5	T1 (7.90, 8.45, 0.36),		4.81	5.77	0.27
				T2 (3.98, 3.29, 0.21)
				P (3.68, 5.67, 0.24)
	qHd-5A	69.5	70.5		T2	3.71	3.59	0.23
	qHd-5B	110.5	112.5	T1		4.58	4.1	0.27
	qHd-5D	232.5	233.5		T4	3.99	2.5	0.26
	qHd-6B	113.5	114.5	T4		6.46	7.72	-0.39
	qHd-6D	19.5	20.5		T1	5.43	6.71	0.32
	qHd-7B.1	29.5	32.5	T1 (10.39, 11.53, -0.42),	T1 (6.35, 7.74, -0.34)	7.56	7.65	-0.46
				T2 (3.93, 4.61, -0.28)
				P (8.23, 7.33, -0.56)
	qHd-7B.2	168.5	169.5	T1		3.03	2.82	-0.22
SL (cm)	qSl-1A	39.5	41.5	T3		3.71	2.05	-0.11
	qSl-1B.1	25.5	26.5	T2		4.09	4.3	0.16
	qSl-1B.2	70.5	73.5		T1	4.29	5.1	-0.19
	qSl-1B.3	78.5	80.5	P		4.35	2.03	0.23
	qSl-2A	64.5	67.5	T1 (3.33, 4.51, -0.15)	T1 (4.63, 4.15, -0.17)	3.98	4.33	-0.16
	qSl-2B	42	57.5	T2 (3.71, 2.76, 0.13),	T2 (3.60, 3.53, 0.15),	3.59	3.11	0.14
				T3 (3.98, 2.25, 0.11),	T3 (3.43, 2.52, 0.13),
					T4 (3.95, 2.27, 0.11)
				P (3.57, 4.33, 0.15)	P (3.48, 2.33, 0.15)
	qSl-2D.1	125.5	131.5	T1 (10.12, 16.58, -0.28)	T1 (14.15, 15.66, -0.33),	10.9	13.2	-0.29
					T3 (9.78, 7.99, -0.23)
					P (10.45, 12.98, -0.29)
	qSl-2D.2	133.5	134.5		T1	3.42	3.84	0.16
	qSl-2D.3	148.5	150.5		T4	3.96	4.9	-0.19
	qSl-3A	141.5	150.5		T1 (7.45, 6.84, 0.22),	6.06	5	0.17
				T3 (5.65, 4.53, 0.16)	T3 (3.73, 2.70, 0.13)
				P (6.56, 5.34, 0.17)
	qSl-4A	152.5	154.5	T2		7.68	7.43	-0.21
	qSl-5A.1	24.5	27.5	T2		6.07	6.1	0.19
	qSl-5A.2	31.5	35.5	T4		3.93	4.04	0.17
	qSl-5A.3	64.5	67.5	T1 (11.30, 17.82, -0.29),	T1 (12.48, 13.09, -0.30),	16.02	20.56	-0.37
				T2 (16.35, 18.13, -0.33),	T2 (9.68, 14.16, -0.29),
				T3 (27.01, 29.01, -0.40),	T3 (29.20, 30.43, -0.45),
				T4 (14.57, 24.05, -0.42),	T4 (13.91, 22.28, -0.39)
				P (16.56, 25.24, -0.37)	P (14.67, 15.33, 0.38)
	qSl-5B.1	0	0.5			5.6	4.13	-0.19
	qSl-5B.2	38.5	40.5	T2		5.6	5.28	-0.18
	qSl-5D	223.5	226.5	T3		4.5	3.42	0.14
	qSl-6A.1	185.5	188.5		T3	3.77	2.89	-0.14
	qSl-6A.2	194.5	196	T3		5.25	4.51	-0.16
	qSl-6B.1	100.5	101.5		T1	3.55	2.5	-0.13
	qSl-6B.2	108.5	109.5		T2	5.41	7.42	-0.21
	qSl-6D	213.5	214.5	T3 (8.37, 6.64, 0.19),	T3 (8.77, 6.74, 0.21)	8.57	6.69	0.2
	qSl-7A.1	0	5.5	T1		3.81	4.8	0.15
	qSl-7A.2	152.5	154.5	T2		5.48	5.19	-0.17
	qSl-7D.1	163.5	170.5	T2 (6.66, 6.83, 0.20),	T2 (8.65, 12.05, 0.27),	6.89	6.47	0.2
				T3 (5.41, 4.36, 0.16),	T3 (5.88, 4.36, 0.17)
				P (7.23, 4.67, 0.18)	P (6.78, 7.87, 0.23)
	qSl-7D.2	205.5	206.5	T4		3.19	4.53	0.18
SN	qSn-1A.1	21.5	22.5	T2		4.28	3.61	-0.24
	qSn-1A.2	135.5	139.5	T3		3.47	2.4	-0.22
	qSn-1A.3	140.5	143.5		T1	3.62	3.53	0.2
	qSn-1B.1	13.5	17.5	T1 (3.75, 10.83, 0.39),	T1 (4.98, 6.56, 0.29)	5.18	8.36	0.35
				T4 (6.81, 7.68, 0.38)
	qSn-1B.2	41.5	43.5	T2		3.01	2.35	0.19
	qSn-2A.1	1.5	2.5	T2		5.55	4.95	0.28
	qSn-2A.2	11.5	14.5		T2 (5.02, 3.88, 0.26),	5.45	3.47	0.24
					T3 (5.42, 3.30, 0.22)
					P (5.68, 3.34, 0.24)
	qSn-2B	46.5	53.5		T3	3.66	1.66	-0.16
	qSn-2D.1	83.5	84.5	T4		3.79	3.15	-0.23
	qSn-2D.2	148.5	149.5		T4	4.16	7.78	-0.4
	qSn-3A.1	0	2.5		T2	3.79	1.96	0.21
	qSn-3A.2	141.5	143.5		T4	3.44	4.41	0.29
	qSn-3A.3	187.5	203.5		T3	3.77	2.41	0.19
	qSn-3B	94.5	99.5	T3 (4.03, 2.32, -0.19),	T3 (3.26, 2.47, -0.21)	3.64	2.39	-0.2
	qSn-4A	151.5	156.5	T1 (3.57, 6.51, -0.30),		3.44	4.58	-0.25
				T2 (3.30, 2.66, -0.21)
	qSn-4B	43.5	45.5	T3 (4.15, 3.08, 0.23),		6.38	6.52	0.32
				T4 (8.62, 9.96, 0.42)
	qSn-4D	38.5	40.5		T3	4.49	2.62	-0.2
	qSn-5A.1	35.5	37.5	T2 (4.57, 3.61, 0.24)		7.02	6.58	0.3
					T3 (12.13, 8.23, 0.35)
					P (5.68, 7.23, 0.30)
	qSn-5A.2	57.5	62.5	T2 (7.94, 7.23, -0.34)		7.64	6.29	-0.29
					T3 (5.24, 3.02, -0.21)
				P (8.68, 7.45, -0.30)
	qSn-5D.1	77.5	88.5		T2	5.37	4.46	0.28
	qSn-5D.2	265.5	270.5	T3		4.26	2.86	0.22
	qSn-6A	112.5	116.5	T4		5.39	6.1	0.33
	qSn-6B.1	88.5	90.5	T2 (3.70, 4.09, -0.26),	T2 (6.17, 6.95, -0.35),	5.61	6.76	-0.27
				T3 (5.07, 5.12, -0.30)	T3 (6.97, 5.41, -0.29)
				P (4.68, 7.43, -0.20)	P (6.68, 7.45, -0.30)
	qSn-6B.2	126.5	128.5		T1	5.91	9.59	-0.33
	qSn-6B.3	146.5	147.5		T4	3.52	3.24	-0.25
	qSn-7A.1	40.5	42.5		T2	3.59	1.95	0.18
	qSn-7A.2	160.5	161.5	T1(4.99, 9.80, -0.37),	T1(24.02, 14.00, -0.69),	22.22	26.26	-0.71
				T2 (24.78, 27.17, -0.66),	T2 (33.28, 35.64, -0.79),
				T3(39.13, 43.37, -0.86),	T3 (38.67, 36.89, -0.75),
				T4 (18.61, 25.58, -0.67),	T4 (18.81, 28.05, -0.52)
				P (14.68, 23.33, -0.67)	P (26.68, 27.89, -0.80)
	qSn-7A.3	228.5	230.5		T2	3.98	2.14	0.19
	qSn-7B.1	92.5	93.5		T2	6.24	5.11	-0.3
	qSn-7B.2	110.5	111.5	T2(2.64, 2.06, -0.18),		6.22	4.2	-0.25
				T3 (8.38, 5.93, -0.32)	T3 (7.63, 4.61, -0.26)
	qSn-7D	166.5	170.5	T1 (8.95, 3.36, 0.37),	T1 (3.09, 3.30, 0.18),	9.89	9.12	0.43
					T2 (7.84, 5.94, 0.32),
				T3 (10.22, 7.95, 0.37)	T3 (11.94, 7.57, 0.34)
				P (8.28, 13.33, 0.47)	P (12.68, 7.89, 0.50)
SC	qSc-1D.1	4.5	7.5	T4		3.62	5.03	0.06
	qSc-1D.2	20.5	24.5		T1	3.77	3.88	0.07
	qSc-2A.1	64.5	65.5	T3		3.57	3.3	0.04
	qSc-2A.2	167.5	168.5	T2		3.67	4.36	-0.03
	qSc-2B.1	44.5	57.5	T1 (5.65, 6.46, -0.07),	T1 (5.46, 8.38, -0.07),	4.35	5.99	-0.06
					T2 (4.12, 7.44, -0.04),
				T3 (6.17, 5.79, -0.06),	T3 (8.03, 9.81, -0.08),
				T4 (3.67, 5.15, -0.05),	T4 (3.24, 4.63, -0.05)
				P (4.28, 3.33, -0.06)	P (3.58, 7.82, -0.06)
	qSc-2B.2	71.5	72.5	T1 (4.77, 8.00, -0.07)		5.11	8.5	-0.07
				P (5.45, 9.00, -0.07)
	qSc-2D	89.5	90.5		T4	5.56	7.54	-0.06
	qSc-3A	148.5	149.5	T3		4.12	3.84	-0.05
	qSc-3D	175.5	181.5	T3		3.64	3.27	-0.04
	qSc-4B.1	19.5	21.5		T1	3.17	4.05	0.04
	qSc-4B.2	51.5	53.5	T2		3.01	4.26	0.07
	qSc-5A.1	19.5	21.5	T1		3.79	5.78	-0.08
	qSc-5A.2	62.5	67.5	T1 (8.75, 15.00, 0.09),	T1 (10.02, 16.10, 0.13),	13.39	19.93	0.14
				T2 (7.37, 13.12, 0.05),	T2 (8.02, 15.47, 0.06),
				T3 (20.40, 23.30, 0.12),	T3 (19.79, 28.38, 0.13),
				T4 (13.98, 20.49, 0.10),	T4 (11.33, 17.31, 0.09)
				P (14.33, 23.33, 0.16)	P (13.38, 17.82, 0.16)
	qSc-5B.1	19.5	21.5	T2		3.85	6.44	0.04
	qSc-5B.2	40.5	41.5		T2	3.71	4.73	0.03
	qSc-5D	62.5	63.5	T3		3.13	2.9	0.04
	qSc-6A	69.5	71.5		T3	3.91	4.98	0.03
	qSc-6D	213.5	214.5	T3		3.09	2.73	-0.04
	qSc-7A	160.5	161.5	T1 (15.04, 17.22, -0.12),	T1 (3.67, 4.87, -0.05),	9.3	13.97	-0.09
				T2 (8.61, 15.66, -0.06),	T2 (8.59, 16.72, -0.06),
				T3 (13.85, 14.77, -0.09),	T3 (11.99, 15.84, -0.10),
				T4 (8.55, 11.66, -0.07),	T4 (8.56, 11.66, -0.07)
				P (10.33, 12.33, -0.09)	P (8.21, 16.82, -0.12)
	qSc-7B	108.5	115.5	T1 (6.13, 9.90, -0.08),	T1 (9.09, 9.24, -0.09),	5.58	8.22	-0.06
				T2 (3.99, 4.96, -0.03),
				T3 (7.04, 6.52, -0.06),
					T4 (3.85, 4.90, -0.05)
				P (5.33, 9.33, -0.06)
	qSc-7D	156.5	157.5	T1		3.68	4.15	-0.05
FSN	qFsn-1A	21.5	22.5	T2		3.88	3.51	-0.22
	qFsn-1B.1	9.5	12.5	T1 (4.58, 9.48, 0.37)		4.46	9.47	0.36
				P (4.33, 9.45, 0.35)
	qFsn-1B.2	27.5	28.5	T2		3.85	2.43	0.21
	qFsn-1B.3	43.5	45.5	T3		3.59	4.58	0.25
	qFsn-1D	155.5	159.5	T4		3.06	3.35	0.25
	qFsn-2A	12.5	17.5	T2 (3.34, 3.82, 0.23),	T2(3.90. 5.07, 0.30)	3.62	4.44	0.27
	qFsn-2B	54.5	55.5	T3		5.01	3.34	-0.24
	qFsn-3A.1	141.5	144.5	T1(6.56, 6.33, 0.34),	T1 (8.01, 12.27, 0.43),	5.12	6.59	0.35
					T2 (3.64, 4.47, 0.29),
					T3 (3.78, 3.09, 0.22),
				T4 (5.22, 6.18, 0.34)	T4 (6.41, 7.97, 0.45)
					P (4.63, 6.45, 0.35)
	qFsn-3A.2	173.5	177.5	T2 (6.10, 7.33, 0.32),		5.3	5.1	0.27
				T3 (4.50, 2.87, 0.22)
	qFsn-3B.1	94.5	96.5		T3	3.3	2.63	-0.21
	qFsn-3B.2	230.5	231.5		T3	3.55	2.94	0.22
	qFsn-3D.1	89.5	92.5	T3		4.74	3.12	-0.23
	qFsn-3D.2	197.5	203.5		T3	3.5	2.08	-0.19
	qFsn-4A	150.5	156.5	T1 (4.91, 9.99, -0.37),		4.78	5.75	-0.28
				T2 (4.15, 4.91, -0.26),
				T3 (4.25, 2.72, -0.22),
					T4 (6.27, 7.73, -0.44)
				P (4.63, 5.45, -0.23)
	qFsn-4B.1	21.5	22.5		T2	3.84	4.61	0.29
	qFsn-4B.2	39.5	43.5	T1 (12.06, 11.74, 0.47),	T1 (5.13, 7.25, 0.34),	11.14	13.64	0.55
				T3 (8.74, 6.30, 0.33),
				T4 (18.36, 24.43, 0.68),	T4 (11.57, 15.37, 0.63)
				P (10.63, 15.45, 0.58)	P (11.63, 12.45, 0.57)
	qFsn-4B.3	61.5	63.5		T1	3.77	5.51	0.24
	qFsn-5A	39.5	40.5	T3		3.53	1.55	0.16
	qFsn-5D.1	0	2.5	T3 (8.55, 5.65, -0.31),	T3 (5.20, 4.20, -0.26)	5.65	4.23	-0.27
				T4 (3.21, 284, -0.23)
	qFsn-5D.2	280.5	289		T4	3.2	3.91	0.32
	qFsn-6A.1	112.5	117.5	T2 (4.04, 3.67, 0.26),		3.99	3.42	0.24
					T3 (3.94, 3.16, 0.22)
	qFsn-6A.2	142.5	153.5	T4		4.1	4.55	0.29
	qFsn-6B.1	88.5	90.5	T2 (3.86, 6.15, -0.30),	T2 (3.45, 5.91, -0.33)	4.25	5.59	-0.32
				T3 (5.21, 5.13, -0.30)
				P (4.33, 5.45, -0.33)
	qFsn-6B.2	135.5	136.5		T1	3.01	6.12	-0.26
	qFsn-7A.1	37.5	38.5		T2	3.66	7.48	0.37
	qFsn-7A.2	62.5	65.5	T4		3.55	4.83	-0.3
	qFsn-7A.3	154.5	161.5	T1 (4.61, 9.11, -0.35),	T1 (17.66, 19.28, -0.60),	19.53	23.45	-0.61
				T2 (15.82, 22.12, -0.56),	T2 (16.49, 23.83, -0.66),
				T3 (36.38, 36.41, -0.79),	T3 (30.71, 36.16, -0.76),
				T4 (10.68, 13.28, -0.50)
				P (19.89, 25.25, -0.63)	P (19.63, 22.23, -0.60)
	qFsn-7D	170.5	171.5	T2 (5.37, 6.30, 0.23),		4.53	4.79	0.25
				T3 (4.07, 2.53, 0.21)
				P (4.33, 5.15, 0.25)
SSN	qSsn-1B.1	1.5	3.5	T2 (4.21, 11.33, 0.34),		4.46	12.92	0.36
				T4 (3.64, 12.49, 0.35),	T4 (5.52, 14.95, 0.38)
	qSsn-1B.2	13.5	16.5		T3 (5.03, 4.98, 0.13)	4.13	4.7	0.13
					P (3.22, 4.42, 0.12)
	qSsn-1D	4.5	8.5	T3		3.85	4.52	0.16
	qSsn-2B	3.5	5.5		T2	3.74	3.67	0.12
	qSsn-2D	88.5	90.5		T3 (4.52, 4.39, -0.11),	3.92	4.4	-0.16
					T4 (3.33, 4.41, -0.20)
	qSsn-3A.1	0	2.5	T4		3.74	5.18	0.25
	qSsn-3A.2	41.5	48.5	T1 (3.83, 4.26, 0.20),	T1 (4.68, 6.96, 0.15),	5.46	6.44	0.15
				T2 (9.76, 11.58, 0.16),
					T3 (5.47, 5.90, 0.13)
				P (5.22, 6.72, 0.18)	P (5.22, 5.42, 0.12)
	qSsn-3A.3	69.5	70.5	T2		7.15	7.89	-0.13
	qSsn-3A.4	138.5	143.5	T1 (3.54, 6.12, -0.17),	T1 (5.63, 8.14, -0.27),	4.64	5.8	-0.17
				T3 (3.95, 3.40, -0.11),	T3 (5.43, 5.54, -0.13)
	qSsn-4B.1	7.5	8.5		T1 (3.76, 6.61, -0.18),	3.68	5.11	-0.14
					T3 (3.59, 3.60, -0.10)
	qSsn-4B.2	17.5	19.5		T1	4.98	7.63	-0.16
	qSsn-4B.3	40.5	44.5	T3 (9.70, 11.38, -0.21),	T3 (8.43, 8.73, -0.16),	8.32	10.17	-0.28
				T4 (7.27, 10.85, -0.31),	T4 (5.25, 6.80, -0.25)
				P (8.98, 10.89, -0.32)
	qSsn-4B.4	64.5	66.5		T1	4.76	7.15	-0.15
	qSsn-4B.5	70.5	71.5	T3		5.8	8.08	0.17
	qSsn-4D	120.5	123.5		T1	3.95	4.58	0.12
	qSsn-5A.1	35.5	36.5		T3	5.08	5.03	0.12
	qSsn-5A.2	195.5	196.5	T4		3.85	4.31	0.24
	qSsn-5B	73.5	75.5	T2 (3.77, 4.37, -0.10),		3.45	4.67	-0.15
				T4 (3.14, 4.96, -0.21)
	qSsn-5D.1	0	5.5	T1 (6.16, 11.66, 0.19),	T1 (9.14, 14.45, 0.21),	8.75	11.22	0.24
				T2 (8.13, 9.14, 0.14),	T2 (11.43, 17.01, 0.25),
				T3 (7.47, 10.82, 0.32),	T3 (12.03, 12.98, 0.20),
					T4 (3.64, 3.35, 0.18)
				P (8.98, 10.19, 0.18)	P (8.98, 12.12, 0.32)
	qSsn-5D.2	11.5	12.5	T3 (11.94, 14.31, 0.23),		6.77	9.99	0.24
					T4 (6.38, 11.62, 0.24)
				P (4.38, 7.01, 0.24)
	qSsn-6A	153.5	164.5		T4	4.8	7.33	-0.26
	qSsn-6B	94.5	95.5	T2 (7.08, 7.93, 0.13)		6.96	8.16	0.13
				P (6.84, 8.39, 0.13)
	qSsn-7A	160.5	161.5	T4		3.55	5.3	-0.22
	qSsn-7B	115.5	120.5	T2 (3.76, 3.03, -0.08)		3.8	3.36	-0.09
					T3 (3.84, 3.69, -0.11)
	qSsn-7D.1	149.5	150.5	T1		3.34	6.6	-0.14
	qSsn-7D.2	162.5	171.5	T1 (3.65, 6.83, 0.15),	T1 (4.62, 7.24, 0.15),	5.26	7.29	0.19
				T2 (6.50, 7.25, 0.12),	T2 (6.53, 9.94, 0.19),
				T3 (5.65, 6.22, 0.15),	T3 (9.73, 10.43, 0.15),
				T4 (4.64, 7.30, 0.26)	T4 (4.42, 5.71, 0.23)
				P (4.64, 6.33, 0.16)	T4 (5.42, 7.91, 0.23)
Note: In column 2, the QTL in bold indicates a major QTL, and the QTL with underline indicates a QTL stably detected in different trials.

## Sheet: Table S6
Table S6 The multi-environment loci detected using GenStat software
Trait	Locus	The responding single-environment QTL detected by IciMapping 4.1	Chromosomes	Position (cM)	LOD	QTL × E	Environments	Effect	Superior allele	Standard errors	P value	PVE%	CI_LL	CI_UL
HD	Locus 1	qHd-1B.1	1B	13.5	5.093	yes	T1LN	0.174	KN9204	0.086	0.042	1.9	0	44.21
(days)							T1HN	0.074	KN9204	0.085	0.385	0.3	*	*
							T2LN	0.316	KN9204	0.081	0	6.2	0	44.21
							T2HN	0.19	KN9204	0.075	0.011	2.4	0	44.21
							T3LN	0.012	KN9204	0.131	0.929	0	*	*
							T3HN	0.052	KN9204	0.125	0.679	0.1	*	*
							T4LN	0.318	KN9204	0.092	0.001	4.8	0	44.21
							T4HN	0.432	KN9204	0.104	0	7.2	0	44.21
	Locus 2	qHd-2D.1	2D	89.1	16.215	yes	T1LN	0.488	J411	0.083	0	15.1	83.17	95.03
							T1HN	0.555	J411	0.083	0	19	83.17	95.03
							T2LN	0.536	J411	0.079	0	17.7	83.17	95.03
							T2HN	0.603	J411	0.073	0	24.1	83.17	95.03
							T3LN	0.618	J411	0.127	0	9.4	83.17	95.03
							T3HN	0.881	J411	0.122	0	18	83.17	95.03
							T4LN	0.715	J411	0.089	0	24.2	83.17	95.03
							T4HN	0.677	J411	0.101	0	17.7	83.17	95.03
	Locus 3	qHd-4B.1	4B	36.7	17.16	yes	T1LN	0.212	KN9204	0.083	0.01	2.9	29.76	43.64
							T1HN	0.281	KN9204	0.082	0.001	4.9	29.76	43.64
							T2LN	0.301	KN9204	0.079	0	5.6	29.76	43.64
							T2HN	0.395	KN9204	0.072	0	10.3	29.76	43.64
							T3LN	0.897	KN9204	0.126	0	19.8	29.76	43.64
							T3HN	0.952	KN9204	0.121	0	21.1	29.76	43.64
							T4LN	0.191	KN9204	0.089	0.031	1.7	29.76	43.64
							T4HN	0.246	KN9204	0.1	0.015	2.3	29.76	43.64
SL	Locus 4	qSl-2D.1	2D	127.3	13.424	yes	T1LN	0.209	J411	0.041	0	9.6	110.96	143.64
(cm)							T1HN	0.169	J411	0.047	0	5.8	110.96	143.64
							T2LN	0.055	J411	0.076	0.469	0.2	*	*
							T2HN	0.116	J411	0.054	0.032	2.2	110.96	143.64
							T3LN	0.242	J411	0.045	0	10.6	110.96	143.64
							T3HN	0.247	J411	0.05	0	9.3	110.96	143.64
							T4LN	0.127	J411	0.052	0.014	2.8	110.96	143.64
							T4HN	0.154	J411	0.051	0.003	3.9	110.96	143.64
	Locus 5	qSl-5A.3	5A	61.8	21.818	yes	T1LN	0.275	J411	0.04	0	16.6	55.65	67.95
							T1HN	0.272	J411	0.046	0	14.9	55.65	67.95
							T2LN	0.13	J411	0.075	0.083	1.1	*	*
							T2HN	0.263	J411	0.053	0	11.3	55.65	67.95
							T3LN	0.324	J411	0.044	0	19	55.65	67.95
							T3HN	0.392	J411	0.049	0	23.4	55.65	67.95
							T4LN	0.278	J411	0.051	0	13.5	55.65	67.95
							T4HN	0.337	J411	0.051	0	18.9	55.65	67.95
	Locus 6	qSl-7A.2	7A	160.8	20.336	yes	T1LN	0.058	J411	0.041	0.158	0.7	*	*
							T1HN	0.005	J411	0.047	0.922	0	*	*
							T2LN	0.719	J411	0.076	0	33.3	153.63	164.97
							T2HN	0.055	J411	0.054	0.305	0.5	*	*
							T3LN	0.013	J411	0.045	0.768	0	*	*
							T3HN	0.039	J411	0.05	0.431	0.2	*	*
							T4LN	0.003	J411	0.052	0.95	0	*	*
							T4HN	0.024	J411	0.051	0.64	0.1	*	*
	Locus 7		7B	108.8	7.239	yes	T1LN	0.171	KN9204	0.042	0	6.5	69.79	147.81
							T1HN	0.085	KN9204	0.048	0.074	1.5	*	*
							T2LN	0.072	KN9204	0.078	0.357	0.3	*	*
							T2HN	0.098	KN9204	0.055	0.076	1.6	*	*
							T3LN	0.158	KN9204	0.046	0.001	4.5	69.79	147.81
							T3HN	0.086	KN9204	0.051	0.092	1.1	*	*
							T4LN	0.17	KN9204	0.05	0.001	5.4	69.79	147.81
							T4HN	0.154	KN9204	0.055	0.005	4	69.79	147.81
SN	Locus 8	qSn-1A.1	1A	19.5	3.941	yes	T1LN	0.07	J411	0.069	0.307	0.6	*	*
							T1HN	0.24	J411	0.055	0	9.3	19.23	39.21
							T2LN	0.026	J411	0.043	0.542	0.2	*	*
							T2HN	0.057	J411	0.062	0.357	0.5	*	*
							T3LN	0.087	J411	0.055	0.114	1.2	*	*
							T3HN	0.142	J411	0.043	0.001	5.2	19.23	39.21
							T4LN	0.114	J411	0.061	0.06	1.9	*	*
							T4HN	0.035	J411	0.054	0.52	0.2	*	*
	Locus 9	qSn-4A	4A	151.6	5.149	yes	T1LN	0.307	J411	0.077	0	7.2	120.35	182.85
							T1HN	0.153	J411	0.067	0.023	2.6	120.35	182.85
							T2LN	0.188	J411	0.048	0	6.2	120.35	182.85
							T2HN	0.163	J411	0.072	0.024	1.7	120.35	182.85
							T3LN	0.07	J411	0.063	0.268	0.3	*	*
							T3HN	0.078	J411	0.064	0.221	0.4	*	*
							T4LN	0.02	J411	0.086	0.82	0	*	*
							T4HN	0.07	J411	0.088	0.426	0.2	*	*
	Locus 10	qSn-5A.2	5A	65.6	11.545	yes	T1LN	0.137	J411	0.076	0.073	1.4	*	*
							T1HN	0.104	J411	0.067	0.121	1.2	*	*
							T2LN	0.327	J411	0.048	0	18.5	57.54	73.66
							T2HN	0.047	J411	0.072	0.515	0.1	*	*
							T3LN	0.008	J411	0.063	0.897	0	*	*
							T3HN	0.023	J411	0.063	0.717	0	*	*
							T4LN	0.003	J411	0.085	0.974	0	*	*
							T4HN	0.141	J411	0.088	0.109	1	*	*
	Locus 11	qSn-7A.2	7A	160.8	33.936	yes	T1LN	0.335	J411	0.077	0	8.5	156.96	164.64
							T1HN	0.262	J411	0.067	0	7.5	156.96	164.64
							T2LN	0.052	J411	0.048	0.28	0.5	*	*
							T2HN	0.66	J411	0.072	0	27.3	156.96	164.64
							T3LN	0.754	J411	0.063	0	35.9	156.96	164.64
							T3HN	0.682	J411	0.064	0	31.2	156.96	164.64
							T4LN	0.62	J411	0.086	0	21.3	156.96	164.64
							T4HN	0.685	J411	0.088	0	23.2	156.96	164.64
	Locus 12	qSn-7B.2	7B	111.1	6.309	yes	T1LN	0.074	J411	0.076	0.33	0.4	*	*
							T1HN	0.029	J411	0.067	0.667	0.1	*	*
							T2LN	0.032	J411	0.048	0.502	0.2	*	*
							T2HN	0.297	J411	0.063	0	5.5	47.78	174.42
							T3LN	0.275	J411	0.063	0	5.1	47.78	174.42
							T3HN	0.173	J411	0.088	0.049	1.5	47.78	174.42
							T4LN	0.232	J411	0.077	0.003	3.1	47.78	174.42
							T4HN	0.132	J411	0.062	0.032	1.8	47.78	174.42
	Locus 13	qSn-7D	7D	168.3	6.162	yes	T1LN	0.176	KN9204	0.076	0.02	2.3	150.09	186.51
							T1HN	0.145	KN9204	0.048	0.002	3.7	150.09	186.51
							T2LN	0.354	KN9204	0.071	0	7.9	150.09	186.51
							T2HN	0.336	KN9204	0.063	0	7.1	150.09	186.51
							T3LN	0.36	KN9204	0.063	0	8.7	150.09	186.51
							T3HN	0.276	KN9204	0.084	0.001	4.2	150.09	186.51
							T4LN	0.299	KN9204	0.087	0.001	4.4	150.09	186.51
							T4HN	0.415	KN9204	0.076	0	9.9	150.09	186.51
SC	Locus 14	qSc-2B.1	2B	52.1	8.47	yes	T1LN	0.045	J411	0.016	0.005	2.9	33.08	71.12
							T1HN	0.069	J411	0.016	0	6.7	33.08	71.12
							T2LN	0.024	J411	0.009	0.011	2.3	33.08	71.12
							T2HN	0.038	J411	0.009	0	5.3	33.08	71.12
							T3LN	0.066	J411	0.013	0	6.2	33.08	71.12
							T3HN	0.08	J411	0.012	0	9.6	33.08	71.12
							T4LN	0.034	J411	0.012	0.007	2.4	33.08	71.12
							T4HN	0.065	J411	0.014	0	7.7	33.08	71.12
	Locus 15	qSC-2D	2D	91.3	5.325	yes	T1LN	0.009	J411	0.016	0.59	0.1	*	*
							T1HN	0.007	J411	0.02	0.722	0.1	*	*
							T2LN	0.031	J411	0.01	0.001	3.5	63.97	118.63
							T2HN	0.04	J411	0.013	0.002	2.2	63.97	118.63
							T3LN	0.046	J411	0.012	0	3.2	63.97	118.63
							T3HN	0.053	J411	0.013	0	5.7	63.97	118.63
							T4LN	0.06	J411	0.013	0	7.7	63.97	118.63
							T4HN	0.03	J411	0.014	0.032	1.7	63.97	118.63
	Locus 16		2D	127.3	8.553	yes	T1LN	0.073	KN9204	0.017	0	7.6	103	151.6
							T1HN	0.047	KN9204	0.021	0.023	2.6	103	151.6
							T2LN	0.022	KN9204	0.01	0.025	1.8	103	151.6
							T2HN	0.076	KN9204	0.013	0	8.2	103	151.6
							T3LN	0.064	KN9204	0.013	0	6.2	103	151.6
							T3HN	0.019	KN9204	0.013	0.161	0.7	*	*
							T4LN	0.015	KN9204	0.013	0.263	0.5	*	*
							T4HN	0.043	KN9204	0.016	0.009	2.6	103	151.6
	Locus 17	qSc-5A.2	5A	65.6	21.89	yes	T1LN	0.082	KN9204	0.016	0	9.7	59.71	71.49
							T1HN	0.097	KN9204	0.02	0	11.1	59.71	71.49
							T2LN	0.056	KN9204	0.009	0	12.5	59.71	71.49
							T2HN	0.06	KN9204	0.009	0	13	59.71	71.49
							T3LN	0.114	KN9204	0.013	0	18.5	59.71	71.49
							T3HN	0.127	KN9204	0.012	0	24.3	59.71	71.49
							T4LN	0.096	KN9204	0.013	0	18.9	59.71	71.49
							T4HN	0.09	KN9204	0.013	0	17.3	59.71	71.49
	Locus 18	qSc-7A	7A	160.8	11.629	yes	T1LN	0.06	J411	0.009	0	14.5	149.94	171.66
							T1HN	0.062	J411	0.009	0	14.1	149.94	171.66
							T2LN	0.093	J411	0.013	0	12.2	149.94	171.66
							T2HN	0.092	J411	0.012	0	12.9	149.94	171.66
							T3LN	0.073	J411	0.013	0	10.9	149.94	171.66
							T3HN	0.074	J411	0.013	0	11.9	149.94	171.66
							T4LN	0.077	J411	0.016	0	8.4	149.94	171.66
							T4HN	0.06	J411	0.014	0	6.5	149.94	171.66
	Locus 19	qSc-7B	7B	108.4	8.227	yes	T1LN	0.079	J411	0.016	0	9	87.51	129.29
							T1HN	0.03	J411	0.01	0.002	3.6	87.51	129.29
							T2LN	0.027	J411	0.01	0.005	2.7	87.51	129.29
							T2HN	0.072	J411	0.013	0	7.3	87.51	129.29
							T3LN	0.039	J411	0.012	0.002	2.3	87.51	129.29
							T3HN	0.025	J411	0.013	0.059	1.3	*	*
							T4LN	0.071	J411	0.016	0	7.1	87.51	129.29
							T4HN	0.049	J411	0.014	0.001	4.4	87.51	129.29
FSN	Locus 20	qFsn-1B.1	1B	2.7	7.565	yes	T1LN	0.309	KN9204	0.084	0	6.6	0	39.35
							T1HN	0.146	KN9204	0.076	0.056	1.9	*	*
							T2LN	0.159	KN9204	0.081	0.05	1.7	*	*
							T2HN	0.066	KN9204	0.082	0.416	0.3	*	*
							T3LN	0.006	KN9204	0.085	0.943	0	*	*
							T3HN	0.296	KN9204	0.1	0.003	3.5	0	39.35
							T4LN	0.095	KN9204	0.082	0.245	0.5	*	*
							T4HN	0.221	KN9204	0.082	0.007	3.2	0	39.35
	Locus 21	qFsn-3A.1	3A	123.9	8.835	yes	T1LN	0.107	KN9204	0.078	0.172	0.8	*	*
							T1HN	0.206	KN9204	0.072	0.004	3.9	103.66	144.14
							T2LN	0.247	KN9204	0.076	0.001	3.8	103.66	144.14
							T2HN	0.19	KN9204	0.066	0.004	2.5	103.66	144.14
							T3LN	0.362	KN9204	0.08	0	6.7	103.66	144.14
							T3HN	0.479	KN9204	0.093	0	9.2	103.66	144.14
							T4LN	0.338	KN9204	0.077	0	6.4	103.66	144.14
							T4HN	0.355	KN9204	0.076	0	8.2	103.66	144.14
	Locus 22	qFsn-4A	4A	149.1	6.582	yes	T1LN	0.377	J411	0.08	0	9.9	130.91	167.29
							T1HN	0.173	J411	0.073	0.018	2.7	130.91	167.29
							T2LN	0.226	J411	0.078	0.004	3.4	130.91	167.29
							T2HN	0.198	J411	0.078	0.011	2.4	130.91	167.29
							T3LN	0.163	J411	0.082	0.046	1.4	130.91	167.29
							T3HN	0.114	J411	0.095	0.233	0.5	*	*
							T4LN	0.241	J411	0.078	0.002	3.3	130.91	167.29
							T4HN	0.362	J411	0.078	0	8.6	130.91	167.29
	Locus 23	qFsn-4B.2	4B	45.3	19.493	yes	T1LN	0.243	KN9204	0.08	0.002	4.1	39.64	50.96
							T1HN	0.268	KN9204	0.077	0.001	4.5	39.64	50.96
							T2LN	0.408	KN9204	0.071	0	10.2	39.64	50.96
							T2HN	0.436	KN9204	0.067	0	13	39.64	50.96
							T3LN	0.702	KN9204	0.081	0	25.2	39.64	50.96
							T3HN	0.544	KN9204	0.095	0	11.9	39.64	50.96
							T4LN	0.508	KN9204	0.078	0	14.6	39.64	50.96
							T4HN	0.36	KN9204	0.077	0	8.5	39.64	50.96
	Locus 24	qFsn-7A.3	7A	160.8	23.925	yes	T1LN	0.266	J411	0.079	0.001	4.9	156.59	165.01
							T1HN	0.541	J411	0.078	0	16.5	156.59	165.01
							T2LN	0.569	J411	0.077	0	21.7	156.59	165.01
							T2HN	0.599	J411	0.077	0	22.5	156.59	165.01
							T3LN	0.732	J411	0.071	0	33	156.59	165.01
							T3HN	0.668	J411	0.067	0	30.5	156.59	165.01
							T4LN	0.416	J411	0.081	0	8.9	156.59	165.01
							T4HN	0.538	J411	0.095	0	11.6	156.59	165.01
	Locus 25	qFsn-7D	7D	167.5	7.724	yes	T1LN	0.014	KN9204	0.081	0.859	0	*	*
							T1HN	0.177	KN9204	0.064	0.006	3.7	150.86	170.74
							T2LN	0.309	KN9204	0.053	0	15.6	150.86	170.74
							T2HN	0.04	KN9204	0.071	0.575	0.2	*	*
							T3LN	0.242	KN9204	0.067	0	6.2	150.86	170.74
							T3HN	0.141	KN9204	0.036	0	8.3	150.86	170.74
							T4LN	0.074	KN9204	0.032	0.02	3.1	150.86	170.74
							T4HN	0.059	KN9204	0.035	0.09	1.7	*	*
SSN	Locus 26	qSsn-1B.1	1B	2.7	14.594	yes	T1LN	0.061	KN9204	0.027	0.026	2.1	0	10.98
							T1HN	0.181	KN9204	0.039	0	9.2	0	10.98
							T2LN	0.076	KN9204	0.036	0.034	1.8	0	10.98
							T2HN	0.12	KN9204	0.033	0	4.7	0	10.98
							T3LN	0.33	KN9204	0.065	0	12	0	10.98
							T3HN	0.389	KN9204	0.059	0	18.1	0	10.98
							T4LN	0.107	KN9204	0.048	0.027	2.3	0	10.98
							T4HN	0.376	KN9204	0.067	0	13.3	0	10.98
	Locus 27	qSsn-4B.3	4B	40.7	6.734	yes	T1LN	0.079	J411	0.038	0.039	2.1	22.18	59.22
							T1HN	0.157	J411	0.037	0	7.5	22.18	59.22
							T2LN	0.135	J411	0.034	0	5.8	22.18	59.22
							T2HN	0.174	J411	0.032	0	9.8	22.18	59.22
							T3LN	0.274	J411	0.062	0	8.3	22.18	59.22
							T3HN	0.228	J411	0.056	0	6.2	22.18	59.22
							T4LN	0.172	J411	0.046	0	5.9	22.18	59.22
							T4HN	0.156	J411	0.064	0.014	2.3	22.18	59.22
	Locus 28	qSsn-5D.1	5D	2.1	18.637	no	T1LN	0.191	KN9204	0.021	0	12.3	0	9.14
							T1HN	0.191	KN9204	0.021	0	11.1	0	9.14
							T2LN	0.191	KN9204	0.021	0	20.8	0	9.14
							T2HN	0.191	KN9204	0.021	0	10.3	0	9.14
							T3LN	0.191	KN9204	0.021	0	11.5	0	9.14
							T3HN	0.191	KN9204	0.021	0	11.7	0	9.14
							T4LN	0.191	KN9204	0.021	0	4	0	9.14
							T4HN	0.191	KN9204	0.021	0	4.4	0	9.14
	Locus 29	qSsn-6B	6B	95	5.934	yes	T1LN	0.008	KN9204	0.038	0.838	0	*	*
							T1HN	0.075	KN9204	0.037	0.043	1.7	79.18	110.82
							T2LN	0.138	KN9204	0.026	0	10.9	79.18	110.82
							T2HN	0.059	KN9204	0.037	0.112	1	*	*
							T3LN	0.04	KN9204	0.034	0.243	0.5	*	*
							T3HN	0.075	KN9204	0.032	0.017	1.8	79.18	110.82
							T4HN	0.067	KN9204	0.056	0.237	0.5	*	*
							Env9	0.123	KN9204	0.046	0.008	3	79.18	110.82
	Locus 30	qSsn-7D.2	7D	161.9	9.527	no	T1LN	0.134	KN9204	0.021	0	6	144.55	179.25
							T1HN	0.134	KN9204	0.021	0	5.4	144.55	179.25
							T2LN	0.134	KN9204	0.021	0	10.2	144.55	179.25
							T2HN	0.134	KN9204	0.021	0	5	144.55	179.25
							T3LN	0.134	KN9204	0.021	0	5.6	144.55	179.25
							T3HN	0.134	KN9204	0.021	0	5.8	144.55	179.25
							T4LN	0.134	KN9204	0.021	0	2	144.55	179.25
							T4HN	0.134	KN9204	0.021	0	2.1	144.55	179.25
Note: The lower and upper 95 % confidence intervals limits for the estimated locations of the QTLs are given by CI_LL and CI_UL, respectively.
In column 3,the QTL in bold indicates a major QTL, and the QTL with underline indicates a QTL stably detected in different trials.

## Sheet: Table S7
Table S7 The loci detected by conditional QTL analysis in this study
Traits	Loci detected by conditioanl QTL analysis	QTL detected by traditional QTL analysis	Chr.	Left CI	Right CI	Environments (LOD, PVE, additive effect)	Mean of LOD	Mean of PVE	Mean of additive effect
HD	Locus 1		2D	111.5	113.5	T1 (3.14, 6.29, 0.18)	3.2	6.79	0.1814
						P (3.25, 7.29, 0.18)
	Locus 2		4A	86.5	88.5	T1	3.4417	6.9931	-0.1919
	Locus 3	qHd-7B.1	7B	29.5	32.5	T1	3.4732	6.2937	-0.1909
SL (cm)	Locus 4		1B	8.5	11.5	T4	3.8028	6.7327	0.1275
	Locus 5		2A	129.5	130.5	T1	3.2194	4.9176	-0.1254
	Locus 6	qSl-2B	2B	54.5	55.5	T2	4.7186	7.9745	0.1
	Locus 7	qSl-2D.1	2D	131.5	132.5	T3 (3.81, 7.45, -0.11)	3.51	7.3	-0.12
						P (3.21, 7.15, -0.12)
	Locus 8		3D	82.5	83.5	T1	3.8226	5.9911	0.1382
	Locus 9		4B	38.5	39.5	T2 (6.10, 9.97, -0.13)	5.1	7.52	-0.14
						P (4.10, 5.07, -0.15)
	Locus 10		5B	69.5	70.5	T1	3.0639	4.6866	-0.1225
	Locus 11		5B	125.5	126.5	T4	3.8504	6.3547	-0.1213
	Locus 12		5D	236.5	242.5	T1	3.0955	4.9296	-0.1253
	Locus 13		6B	37.5	38.5	T2	3.653	4.401	0.0887
	Locus 14	qSl-7A.1	7A	152.5	154.5	T1	3.4716	5.4793	-0.0991
SN	Locus 15	qSn-1A.1*	1A	21.5	22.5	T2 (5.13, 10.25, -0.26)	4.58	10.12	-0.25
						P (4.03, 9.98, -0.24)
	Locus 16		3A	44.5	45.5	T4	3.1997	7.1397	0.2151
	Locus 17		3B	77.5	81.5	T2	3.6216	5.4569	0.192
	Locus 18		4A	115.5	117.5	T4	3.4742	7.2009	-0.2159
	Locus 19		6A	93.5	94.5	T1	3.7107	6.8265	-0.2741
	Locus 20	qSn-7A.2	7A	142.5	161.5	T1 (3.61, 5.33, -0.24)	3.44	5.04	-0.2
						T3 (3.71, 6.17, -0.15)
						P (3.21, 4.32, -0.20)
	Locus 21	qSn-7B.2	7B	116.5	122.5	T3	3.4129	7.9965	-0.1715
SC	Locus 22		1A	52.5	56.5	T1	3.0946	5.8164	0.0873
	Locus 23	qSc-2A.1	2A	64.5	65.5	T3	5.3873	7.7004	0.0309
	Locus 24		2B	38.5	41.5	T2	3.9329	5.5883	-0.0262
	Locus 25		3B	125.5	127.5	T1	3.0371	5.3276	0.0857
	Locus 26	qSc-4B.2	4B	51.5	53.5	T2 (4.14, 9.57, 0.11)	3.96	7.45	0.16
						P (3.78, 5.32, 0.20)
	Locus 27	qSc-5A.2	5A	65.5	66.5	T2 (12.55, 20.08, 0.08)	6.9	11.51	0.09
						T3 (3.50, 9.32, 0.08)
						P (5.78, 8.32, 0.10)
	Locus 28		7A	0	5.5	T1	4.6649	11.6733	-0.1236
	Locus 29	qSc-7A	7A	160.5	161.5	T2	7.906	11.7851	-0.0381
	Locus 30	qSc-7B	7B	114.5	115.5	T4	4.3612	9.3561	-0.1056
	Locus 31		7B	146.5	147.5	T3	4.0604	9.949	-0.0941
FSN	Locus 32	qFsn-1A	1A	21.5	22.5	T2 (5.16, 10.17, -0.28)	5.17	10.75	-0.29
						P (5.18, 11.32, -0.29)
	Locus 33	qFsn-1B.1*	1B	9.5	13.5	T1	3.71	8.6	0.35
	Locus 34	qFsn-2B	2B	55.5	56.5	T3	3.5605	6.0976	-0.1916
	Locus 35		3A	44.5	47.5	T3 (3.24, 5.47, 0.18)	3.26	5.71	0.22
						T4 (3.86, 7.93, 0.27)
						P (3.28, 4.72, 0.20)
	Locus 36		3A	116.5	117.5	T3	4.0187	6.3769	0.1986
	Locus 37		4A	115.5	117.5	T4	3.509	6.8905	-0.2522
	Locus 38		4B	1.5	3.5	T4	3.5227	6.907	0.2526
	Locus 39		5B	47.5	49.5	T2	3.7453	6.9937	-0.2348
	Locus 40		6B	72.5	86.5	T4	3.6156	3.1666	0.299
	Locus 41	qFsn-7A.3	7A	150.5	151.5	T3 (6.69, 11.56, -0.26)	5.99	10.64	-0.23
						P (5.28, 9.72, -0.20)
	Locus 42		7A	245.5	246.5	T3	4.7412	10.3421	0.2662
	Locus 43	qFsn-7D*	7D	166.5	170.5	T2(3.62, 6.94, 0.23)	3.89	6.15	0.225
						T3(3.58, 5.03, 0.22)
						P (4.18, 6.32, 0.23)
SSN	Locus 44	qSsn-1B.1	1B	0	3.5	T4	3.3657	8.1567	0.1525
	Locus 45		2D	35.5	36.5	T2	3.2148	7.7349	0.1092
	Locus 46		3A	0	21.5	T4	3.5788	7.1095	0.2907
	Locus 47		3D	66.5	67.5	T2	4.2287	9.5309	-0.1212
	Locus 48		4B	1.5	3.5	T4 (4.59, 11.63, -0.21)	4.69	9.98	-0.22
						P (4.78, 8.32, -0.23)
	Locus 49	qSsn-4B.3	4B	43.5	44.5	T4	3.0564	4.1632	-0.1994
	Locus 50		4B	74.5	75.5	T3	2.9976	6.892	0.1183
	Locus 51	qSsn-5D.1	5D	11.5	12.5	T3	3.9254	6.7446	0.1191
	Locus 52	qSsn-6B	6B	94.5	95.5	T2	3.6339	5.5693	0.0934
	Locus 53		6D	94.5	95.5	T1	3.1295	6.4223	-0.1295
	Locus 54		7A	193.5	194.5	T2	3.0503	6.3407	-0.0989
In column 2, the locus in bold indicates it is with main effect. The underlined locus indicates it can be repeatedly detected in different trials.
In column 3,the QTL in yellow indicates it can be detected only under LN treatment. The QTL in bold indicates it is a major QTL, and the QTL with underline indicates it is a stable QTL. * indicates the QTL is a completely LN-stress induced QTL.

## Sheet: Table S8
Table S8 The pyramiding effect on SN, FSN and KN
Genotypes	QTL			Number	Traits
	qSn-1A.1	qFsn-1B.1	qFsn-7D		SN			FSN			KN
					LN	HN	HN-LN	LN	HN	HN-LN	LN	HN	HN-LN
Type1	BB	AA	AA	7	19.84±0.52 a	20.05±0.47 a	0.21±0.16 a	17.31±0.44 a	17.36±0.41 a	0.05±0.31 a	39.68±2.40 ab	41.08±1.17 ab	1.20±0.68 a
Type2	AA	AA	AA	10	19.08±0.33 a	19.17±0.30 ab	0.09±0.15 a	16.91±0.29 a	16.52±0.30 ab	0.39±0.16 b	39.30±1.33 ab	40.05±1.00 ab	0.75±0.84 a
Type3	BB	BB	AA	10	18.71±0.44 ab	19.24±0.34 ab	0.53±0.16 ab	16.88±0.50 ab	16.94±0.40 ab	0.06±0.17 a	42.50±2.15 a	43.45±1.98 ab	0.95±0.81 a
Type4	BB	AA	BB	8	18.01±0.23 ab	18.61±0.23 ab	0.60±0.13 b	16.26±0.15 ab	16.27±0.27 b	0.00±0.22 a	36.61±1.49 b	39.13±1.51 ab	2.52±0.99 b
Type5	AA	BB	AA	8	19.15±0.25 ab	19.71±0.28 b	0.56±0.04 ab	17.82±0.33 a	17.89±0.42 a	0.07±0.09 a	44.42±1.40 a	46.49±2.34 a	2.07±0.94 ab
Type6	AA	AA	BB	5	17.84±0.36 b	18.35±0.14 ab	0.50±0.23 ab	16.04±0.25 b	16.28±0.11 b	0.24±0.32 ab	39.45±0.93 ab	41.27±1.26 ab	1.82±0.77 ab
Type7	BB	BB	BB	8	18.25±0.46 ab	18.78±0.43 ab	0.53±0.15 ab	16.54±0.40 ab	16.70±0.44 ab	0.16±0.19 ab	38.09±1.84 ab	39.76±1.57 b	1.68±0.89 ab
Type8	AA	BB	BB	11	17.62±0.27 b	18.26±0.26 b	0.64±0.14 b	16.09±0.28 b	16.39±0.21 b	0.30±0.16 b	37.30±1.41 b	39.39±1.08 b	2.09±0.59 b
Note: AA indicates alleles from KN9204.BB indicates alleles from J411.Data are means±standard error; the letters below the data indicate its significance detected by ANOVA.

## Sheet: Table S9
Table S9 The homoeologous genes in the syntenic region between R7A and R7B
Homoeologous genes in R7A	Location	Homoeologous genes in R7B	Location		The best hits	Score	E value	Identity (%)	Annotation
TraesCS7A01G473100	669026741	TraesCS7B01G373900	639380987	KQK17060.1	hypothetical protein BRADI_1g32265v3 [Brachypodium distachyon]	412	2e-80	54	polypeptide binding
TraesCS7A01G473000	668998761	TraesCS7B01G374300	639793049	EMS47058.1	Inorganic pyrophosphatase 2 [Triticum urartu]	565	3e-118	93	Inorganic pyrophosphatase 2
TraesCS7A01G473200	669028823	TraesCS7B01G374500	639847994	XP_020162539.1	protein DETOXIFICATION 16-like [Aegilops tauschii subsp. tauschii]	850	4e-166	87	ukaryotic members of the multidrug and toxic compound extrusion (MATE) famil
TraesCS7A01G473300	669199189	TraesCS7B01G374700	639915587	XP_020162532.1	uncharacterized protein LOC109747897 [Aegilops tauschii subsp. tauschii]	424	2e-113	85
TraesCS7A01G473400	669215073	TraesCS7B01G374800	639926003	EMS45228.1	Germin-like protein 8-9 [Triticum urartu]	762	3e-128	98
TraesCS7A01G473500	669277356	TraesCS7B01G375000	640146513	EMS49326.1	BTB/POZ and MATH domain-containing protein 1 [Triticum urartu]	670	3e-133	62
TraesCS7A01G473800	669403952	TraesCS7B01G375100	640511452	XP_021308353.1	uncharacterized protein LOC8064498 [Sorghum bicolor]	375	1e-66	50
TraesCS7A01G473900	669514276	TraesCS7B01G375300	640714322	EMS52006.1	Phosphoglycerate kinase, cytosolic [Triticum urartu]	762	1e-107	98	Phosphoglycerate kinase, cytosolic
TraesCS7A01G474000	669551757	TraesCS7B01G375400	640775167	XP_020178482.1	uncharacterized protein LOC109764049 [Aegilops tauschii subsp. tauschii]	815	3e-117	99
TraesCS7A01G474200	669727531	TraesCS7B01G375600	640914744	EMS52002.1	Peroxidase 2 [Triticum urartu]	663	0	99	Horseradish peroxidase and related secretory plant peroxidases
TraesCS7A01G474300	669736150	TraesCS7B01G375700	640945737	XP_020200816.1	BTB/POZ and MATH domain-containing protein 1-like [Aegilops tauschii subsp. tauschii]	395	4e-134	60	BTB/POZ and MATH domain-containing protein 1-like
TraesCS7A01G474400	669771394	TraesCS7B01G376000	641141328	XP_020200817.1	peroxidase 2-like [Aegilops tauschii subsp. tauschii]	583	0	72	Horseradish peroxidase and related secretory plant peroxidases
TraesCS7A01G474500	669776608	TraesCS7B01G376100	641146462	XP_020200816.1	BTB/POZ and MATH domain-containing protein 1-like [Aegilops tauschii subsp. tauschii]	204	1e-62	98	BTB/POZ and MATH domain-containing protein 1-like
TraesCS7A01G474600	669778162	TraesCS7B01G376200	641148303	SPT21077.1	unnamed protein product [Triticum aestivum]	171	3e-46	80
TraesCS7A01G474700	669782613	TraesCS7B01G376300	641194077	XP_020180857.1	GDSL esterase/lipase At1g28600-like [Aegilops tauschii subsp. tauschii]	534	8e-135	66	a plant specific subfamily of the SGNH-family of hydrolases, a diverse family of lipases and esterases. The tertiary fold of the enzyme is substantially differen from that of the alpha/beta hydrolase family and unique among all known hydrolases
TraesCS7A01G474800	670164861	TraesCS7B01G376500	641367416	EMS50241.1	Nuclear transcription factor Y subunit C-2 [Triticum urartu]	315	1e-95	99	Histone-like transcription factor (CBF/NF-Y) and archaeal histone
TraesCS7A01G475100	670245013	TraesCS7B01G376800	641677257	XP_020190903.1	uncharacterized protein LOC109776657 [Aegilops tauschii subsp. tauschii]	206	4e-63	89
TraesCS7A01G475200	670264521	TraesCS7B01G377100	641805844	WP_056604355.1	allantoate amidohydrolase [Nocardioides sp. Soil774]	40.8	4.2	32
TraesCS7A01G475300	670282984	TraesCS7B01G376700	641603519	XP_020190906.1	aspartic proteinase nepenthesin-1-like [Aegilops tauschii subsp. tauschii]	626	0	89	Chroloplast Nucleoids DNA-binding Protease and Nucellin, pepsin-like aspartic proteases from plants
TraesCS7A01G475400	670527886	TraesCS7B01G377500	642255846	XP_020168173.1	nuclear transcription factor Y subunit C-4-like [Aegilops tauschii subsp. tauschii]	337	2e-101	96	Class 2 transcription repressor NC2, alpha subunit (DRAP1 homolog) [Transcription]
TraesCS7A01G475500	670553586	TraesCS7B01G377600	642264578	XP_020190903.1	uncharacterized protein LOC109776657 [Aegilops tauschii subsp. tauschii]	294	1e-91	71
TraesCS7A01G476700	670821522	TraesCS7B01G377900	642281515	XP_020168167.1	probable LRR receptor-like serine/threonine-protein kinase At3g47570 [Aegilops tauschii subsp. tauschii]	1590	0	90	leucine-rich repeat
TraesCS7A01G476800	670853392	TraesCS7B01G378300	642758253	XP_020168172.1	receptor kinase-like protein Xa21 [Aegilops tauschii subsp. tauschii]	1724	0	93	leucine-rich repeat receptor-like protein kinase
TraesCS7A01G476900	670864558	TraesCS7B01G378400	642831142	XP_020168174.1	uncharacterized protein LOC109753672 [Aegilops tauschii subsp. tauschii]	131	2e-37	89
TraesCS7A01G477000	670888787	TraesCS7B01G378600	643126811	EMS63156.1	F-box only protein 7 [Triticum urartu]	600	0	96	F-box-like
TraesCS7A01G477100	670945813	TraesCS7B01G379100	643462228	XP_020168166.1	peroxidase 70-like [Aegilops tauschii subsp. tauschii]	589	3e-151	95	Horseradish peroxidase and related secretory plant peroxidases
TraesCS7A01G477300	670959602	TraesCS7B01G378900	643350213	XP_020196631.1	probable ubiquitin conjugation factor E4 [Aegilops tauschii subsp. tauschii]	1758	0	99	U-box domain, a modified RING finger, found in ubiquitin conjugation factor E4 A (UBE4A) and similar proteins
TraesCS7A01G477400	671073279	TraesCS7B01G379300	643566510	XP_025878333.1	WAT1-related protein At1g09380 [Oryza sativa Japonica Group]	371	4e-72	84	nodulin MtN21 family protein; Provisional
TraesCS7A01G477500	671120188	TraesCS7B01G379400	643624344	XP_020195405.1	uncharacterized protein LOC109781215 [Aegilops tauschii subsp. tauschii]	423	1e-107	67	RT_nLTR: Non-LTR (long terminal repeat) retrotransposon and non-LTR retrovirus reverse transcriptase (RT). This subfamily contains both non-LTR retrotransposons and non-LTR retrovirus RTs. RTs catalyze the conversion of single-stranded RNA into…
TraesCS7A01G477900	671218518	TraesCS7B01G380300	645256055	EMS66611.1	putative glutathione S-transferase GSTU6 [Triticum urartu]	385	5e-97	98	Glutathione S-transferase [Posttranslational modification, protein turnover, chaperones]
TraesCS7A01G478100	671412558	TraesCS7B01G380500	645384979	KZV51261.1	hypothetical protein F511_05918 [Dorcoceras hygrometricum]	598	2e-76	57
TraesCS7A01G478200	671419642	TraesCS7B01G380600	645391794	XP_020178183.1	RING-H2 finger protein ATL73-like [Aegilops tauschii subsp. tauschii]	159	1e-44	88	RING finger, H2 subclass, found in the PA-TM-RING ubiquitin ligase family
TraesCS7A01G478400	671426396	TraesCS7B01G380900	645400592	EMS48829.1	Disease resistance RPP13-like protein 4 [Triticum urartu]	447	9e-165	76	Coiled-coil domain of the potato virux X resistance protein and similar proteins
TraesCS7A01G478500	671446002	TraesCS7B01G381200	645588688	XP_020178181.1	ABC transporter G family member 41-like [Aegilops tauschii subsp. tauschii]	95.9	2e-20	98	ATPases associated with a variety of cellular activities
TraesCS7A01G478600	671466827	TraesCS7B01G381300	646063708	BAK02322.1	predicted protein [Hordeum vulgare subsp. vulgare]	779	2e-67	95	Domain of unknown function DUF21
TraesCS7A01G478700	671483009	TraesCS7B01G381400	646209569	XP_020196677.1	VQ motif-containing protein 22-like [Aegilops tauschii subsp. tauschii]	225	9e-70	79
TraesCS7A01G479100	671847340	TraesCS7B01G381500	646680061	XP_020156029.1	uncharacterized protein LOC109741359 [Aegilops tauschii subsp. tauschii]	417	2e-52	91
TraesCS7A01G479200	671925707	TraesCS7B01G381600	646999012	BAD45394.1	thioredoxin-like [Oryza sativa Japonica Group]	170	2e-16	55	TRX family; composed of two groups: Group I, which includes proteins that exclusively encode a TRX domain; and Group II, which are composed of fusion proteins of TRX and additional domains. Group I TRX is a small ancient protein that alter the redox…
TraesCS7A01G479300	671937328	TraesCS7B01G381900	647132483	EMS50589.1	hypothetical protein TRIUR3_03715 [Triticum urartu]	476	5e-167	99
TraesCS7A01G479600	672013999	TraesCS7B01G382000	647751459	XP_020190438.1	ureide permease 1-like [Aegilops tauschii subsp. tauschii]	670	9e-96	94
TraesCS7A01G479800	672024985	TraesCS7B01G382100	647758196	EMS50586.1	Eukaryotic translation initiation factor 5B [Triticum urartu]	1371	0	90	translation initiation factor IF-2
TraesCS7A01G479900	672041945	TraesCS7B01G382200	648042287	KQK01434.1	hypothetical protein BRADI_3g55810v3 [Brachypodium distachyon]	350	5e-53	97	S-adenosylmethionine-dependent methyltransferases (SAM or AdoMet-MTase), class I; AdoMet-MTases are enzymes that use S-adenosyl-L-methionine (SAM or AdoMet) as a substrate for methyltransfer, creating the product S-adenosyl-L-homocysteine (AdoHcy)
TraesCS7A01G480100	672069735	TraesCS7B01G382300	648103932	BAF20219.2	Os06g0665800 [Oryza sativa Japonica Group]	283	1e-94	98
TraesCS7A01G480200	672148863	TraesCS7B01G382400	648139017	XP_020190441.1	F-box protein At5g07610 [Aegilops tauschii subsp. tauschii]	202	2e-63	69	F-box domain
TraesCS7A01G480400	672316013	TraesCS7B01G382500	648378414	XP_020196478.1	F-box protein At5g07610-like [Aegilops tauschii subsp. tauschii]	364	1e-118	54	F-box associated
TraesCS7A01G480600	672855814	TraesCS7B01G382700	648656041	XP_020175833.1	aspartic proteinase-like protein 2 [Aegilops tauschii subsp. tauschii]	434	9e-49	49	Chroloplast Nucleoids DNA-binding Protease and Nucellin, pepsin-like aspartic proteases from plants
TraesCS7A01G480700	672872712	TraesCS7B01G382800	648668890	EMS53132.1	Magnesium-chelatase subunit chlI, chloroplastic [Triticum urartu]	664	0	94
TraesCS7A01G481200	673243794	TraesCS7B01G383200	648916626	XP_020184962.1	F-box protein At5g07610-like [Aegilops tauschii subsp. tauschii]	702	0	91	A Receptor for Ubiquitination Targets
TraesCS7A01G481500	674015727	TraesCS7B01G383900	649844927	XP_020154665.1	probable allantoate deiminase [Aegilops tauschii subsp. tauschii]	822	1e-118	73	M20 Peptidase beta-alanine synthase, an amidohydrolase
TraesCS7A01G481600	674081462	TraesCS7B01G384000	649950255	XP_020154668.1	protein UNUSUAL FLORAL ORGANS [Aegilops tauschii subsp. tauschii]	577	2e-92	97	F-box domain
TraesCS7A01G481800	674103803	TraesCS7B01G384100	649991532	ONM51488.1	Syntaxin 132 [Zea mays]	481	7e-44	58
TraesCS7A01G482000	674270191	TraesCS7B01G384200	650124948	EMS67856.1	Haloacid dehalogenase-like hydrolase domain-containing protein 3 [Triticum urartu]	507	4e-133	83	REG-2-like, HAD superfamily (subfamily IA) hydrolase
TraesCS7A01G482100	674273136	TraesCS7B01G384300	650128138	XP_020179793.1	protein DETOXIFICATION 34-like [Aegilops tauschii subsp. tauschii]	818	0	89	Eukaryotic members of the multidrug and toxic compound extrusion (MATE) family
TraesCS7A01G482300	674298082	TraesCS7B01G384400	650130371	XP_020168375.1	serine carboxypeptidase-like 51 [Aegilops tauschii subsp. tauschii]	695	3e-76	84	Serine carboxypeptidase
TraesCS7A01G482400	674505466	TraesCS7B01G384500	650238732	EMS68039.1	Cortical cell-delineating protein [Triticum urartu]	179	4e-53	95	HPS_like: Hydrophobic Protein from Soybean (HPS)-like subfamily; composed of proteins with similarity to HPS, a small hydrophobic protein with unknown function related to cereal-type alpha-amylase inhibitors and lipid transfer proteins.
TraesCS7A01G482600	674520454	TraesCS7B01G384900	650361486	EMS68038.1	Cortical cell-delineating protein [Triticum urartu]	127	2e-33	98	HPS_like: Hydrophobic Protein from Soybean (HPS)-like subfamily; composed of proteins with similarity to HPS, a small hydrophobic protein with unknown function related to cereal-type alpha-amylase inhibitors and lipid transfer proteins.
TraesCS7A01G482800	674752092	TraesCS7B01G384600	650294286	XP_020179594.1	cortical cell-delineating protein-like [Aegilops tauschii subsp. tauschii]	122	6e-33	96	HPS_like: Hydrophobic Protein from Soybean (HPS)-like subfamily; composed of proteins with similarity to HPS, a small hydrophobic protein with unknown function related to cereal-type alpha-amylase inhibitors and lipid transfer proteins.
TraesCS7A01G482900	674796096	TraesCS7B01G384900	650361486	EMS61013.1	Cortical cell-delineating protein [Triticum urartu]	129	4e-34	99	HPS_like: Hydrophobic Protein from Soybean (HPS)-like subfamily; composed of proteins with similarity to HPS, a small hydrophobic protein with unknown function related to cereal-type alpha-amylase inhibitors and lipid transfer proteins.
TraesCS7A01G483000	674802099	TraesCS7B01G385600	650584396	EMS64339.1	Cortical cell-delineating protein [Triticum urartu]	131	1e-36	99	HPS_like: Hydrophobic Protein from Soybean (HPS)-like subfamily; composed of proteins with similarity to HPS, a small hydrophobic protein with unknown function related to cereal-type alpha-amylase inhibitors and lipid transfer proteins.
TraesCS7A01G483100	674813993	TraesCS7B01G385700	650611266	EMS60375.1	Myb family transcription factor APL [Triticum urartu]	635	3e-121	99	myb-like DNA-binding domain, SHAQKYF class
TraesCS7A01G483200	674873899	TraesCS7B01G385900	650665206	XP_020179589.1	chloroplast processing peptidase-like isoform X2 [Aegilops tauschii subsp. tauschii]	333	6e-33	99	Signal peptidase, peptidase S26
TraesCS7A01G483400	675025492	TraesCS7B01G386100	651145244	EMS57660.1	hypothetical protein TRIUR3_09337 [Triticum urartu]	323	8e-105	99
TraesCS7A01G483700	675227916	TraesCS7B01G387100	653016801	XP_020182017.1	vacuolar-sorting receptor 6-like [Aegilops tauschii subsp. tauschii]	1229	0	99	Complement Clr-like EGF-like
TraesCS7A01G483800	675232434	TraesCS7B01G386900	653013256	XP_020182018.1	formin-like protein 6 [Aegilops tauschii subsp. tauschii]	512	9e-96	96	Herpesvirus ICP4-like protein C-terminal region
TraesCS7A01G483800	675232434	TraesCS7B01G387000	653013782
TraesCS7A01G484000	675322201	TraesCS7B01G387400	653280545	EMS52220.1	Aspartic proteinase nepenthesin-2 [Triticum urartu]	858	0	99	Cellular and retroviral pepsin-like aspartate proteases
